# Supplementary material for: Measuring endemicity and burden of leprosy across countries and regions: A systematic review and Delphi survey
Source: PubMed Central journal article supplement (PMC8483296; doi:10.1371/journal.pntd.0009769), 2021-09-20

## Delphi Survey Round 2

### Indicators of Endemicity

1. Which of the following indicators are relevant to classify endemicity of leprosy at sub-national level? Rank them in their order of importance: 1 being the most important and onward numbers being less important; two or more indicators may be ranked the same if they are equally important. Any indicator which you may consider non-relevant could be ranked as NA. (N=18)

| Indicator                                                               | Ranking |   |   |   |   |   |   |   |   |     | Rank score (0-5) | % Rank top-3 |
|-------------------------------------------------------------------------|---------|---|---|---|---|---|---|---|---|-----|------------------|--------------|
|                                                                         | 1       | 2 | 3 | 4 | 5 | 6 | 7 | 8 | 9 | 10+ |                  |              |
| New case detection (number and/or rate)                                 | 11      | 4 | 1 |   |   |   |   |   |   |     | 4.1              | 88.9         |
| New cases detected among children (number and/or rate)                  | 2       | 3 | 3 | 2 | 1 |   | 1 |   |   |     | 2.0              | 44.4         |
| Number of new and old cases found by survey and active screening        | 1       |   |   |   |   |   |   |   |   |     | 0.3              | 5.6          |
| New case trend                                                          | 1       | 1 | 1 | 1 |   |   | 1 |   |   | 2   | 0.8              | 16.7         |
| Rate of skin smear positive cases per 100,000 population                | 1       |   | 1 |   |   | 1 |   |   | 1 | 2   | 0.4              | 11.1         |
| Age-specific incidence rate                                             | 1       |   | 1 |   |   |   | 1 | 1 | 1 | 1   | 0.4              | 11.1         |
| Suspect cases (at the clinic)                                           | 1       |   |   |   |   | 1 |   |   | 2 | 1   | 0.3              | 5.6          |
| Proportion of G2D cases among total new cases detected                  |         | 4 | 1 | 1 |   | 2 | 1 | 1 |   |     | 1.2              | 27.8         |
| Proportion of child cases among total new cases detected                |         | 2 | 1 | 5 | 1 | 1 |   |   |   |     | 1.2              | 16.7         |
| New cases detected with G2D (number and/or rate)                        |         | 1 | 3 |   | 3 |   | 1 |   |   |     | 0.9              | 22.2         |
| Proportion of household contacts with leprosy during routine monitoring |         | 1 |   | 1 | 1 |   | 1 | 1 |   | 2   | 0.4              | 5.6          |
| Number of new and old cases found by survey and active screening        |         |   | 1 | 2 | 1 |   |   |   |   | 2   | 0.4              | 5.6          |
| Proportion of MB cases among total new cases detected                   |         |   | 1 | 1 | 3 | 2 |   | 2 |   | 1   | 0.4              | 5.6          |
| Prevalence (number and/or rate)                                         |         |   |   |   | 1 | 1 |   |   |   | 2   | 0.1              | 0.0          |
| Quality of control program (in terms of interventions)                  |         |   |   |   |   |   |   | 1 |   | 3   | 0.0              | 0.0          |

### Usage of indicators to Determine Endemicity

Please indicate to what extent you agree with the following statements:

2. In order to determine leprosy endemicity, we should use the indicator value of a single year. (N=18)

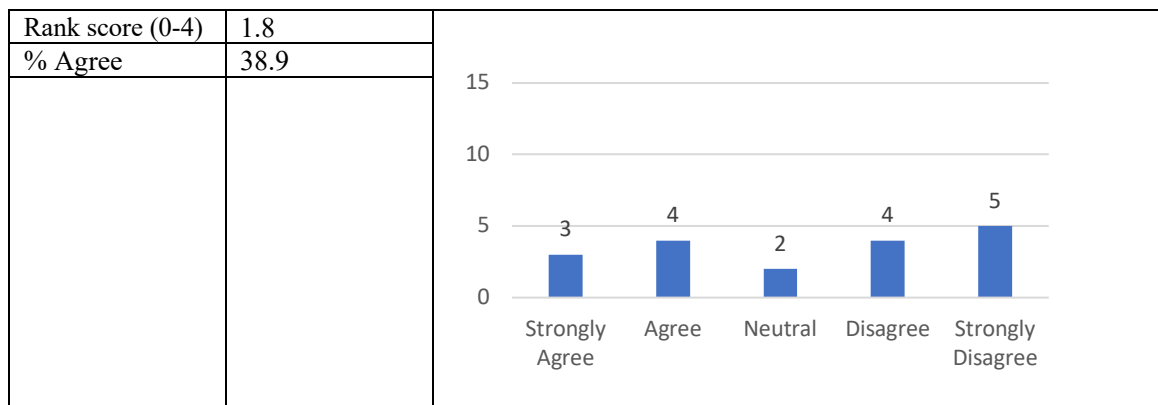

3. In order to determine leprosy endemicity, we should use the average indicator value of past three years. (N=18)

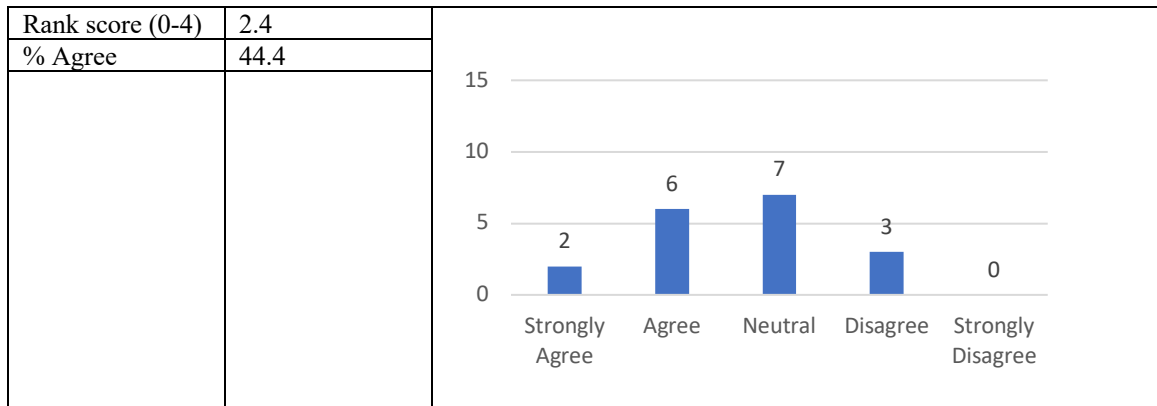

4. In order to determine leprosy endemicity, we should use the average indicator value of past five years. (N=18)

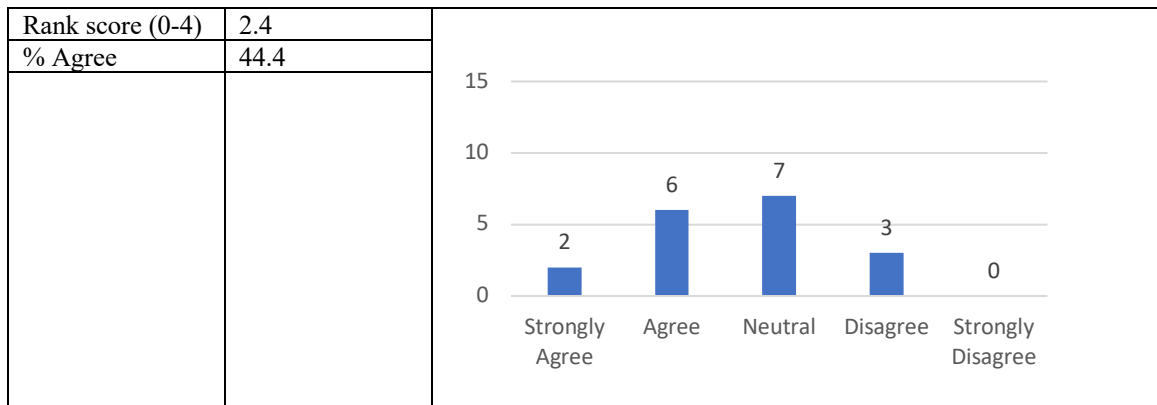

5. In order to determine leprosy endemicity, we should use the average indicator value of past ten years. (N=18)

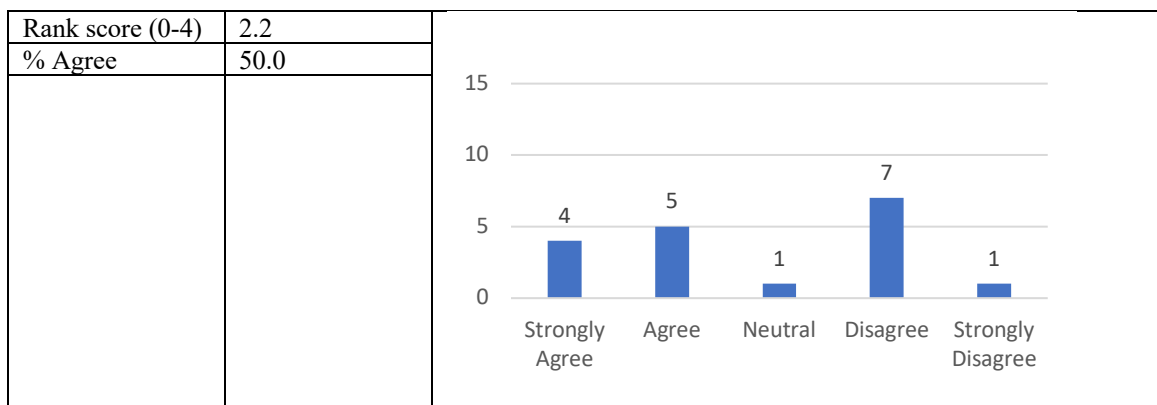

6. In order to determine leprosy endemicity, we should consider both the indicator value of a single year and the average indicator value of the past three/five/ten years. (N=18)

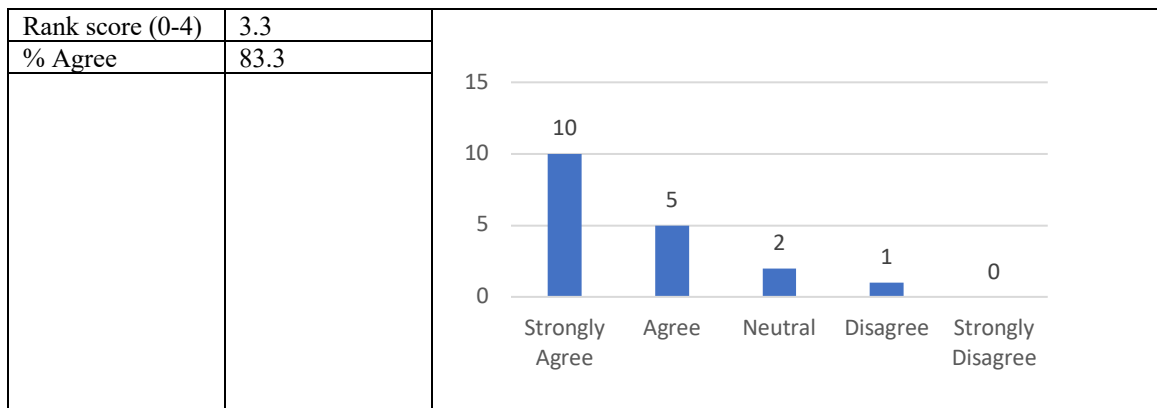

### Classification Levels of Endemicity

7. Which of the following levels are relevant to categorize endemicity of leprosy at sub-national level? Please indicate your opinion against each of the mentioned levels. (N=15)

Hyperendemic

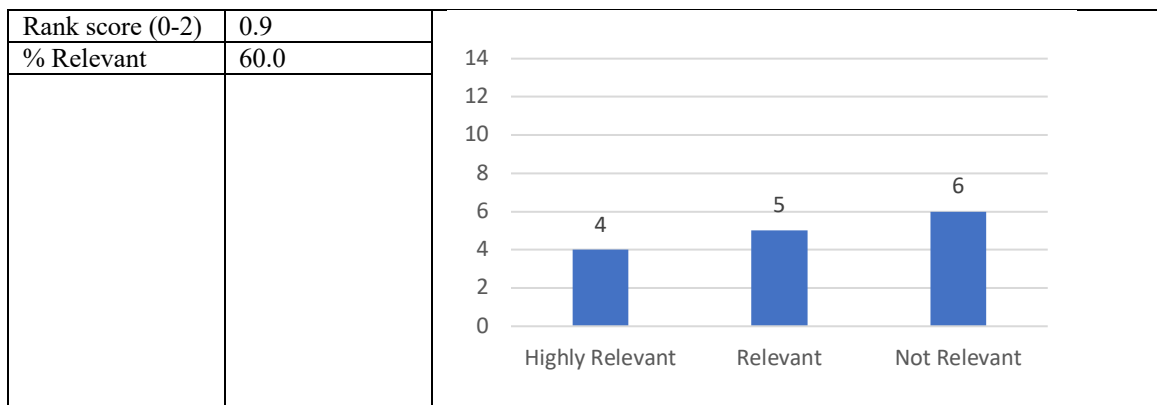

High

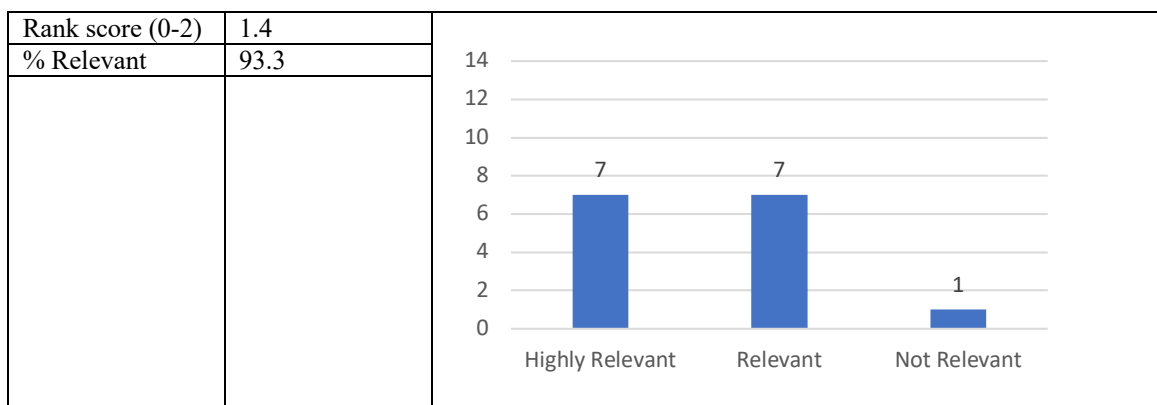

Medium

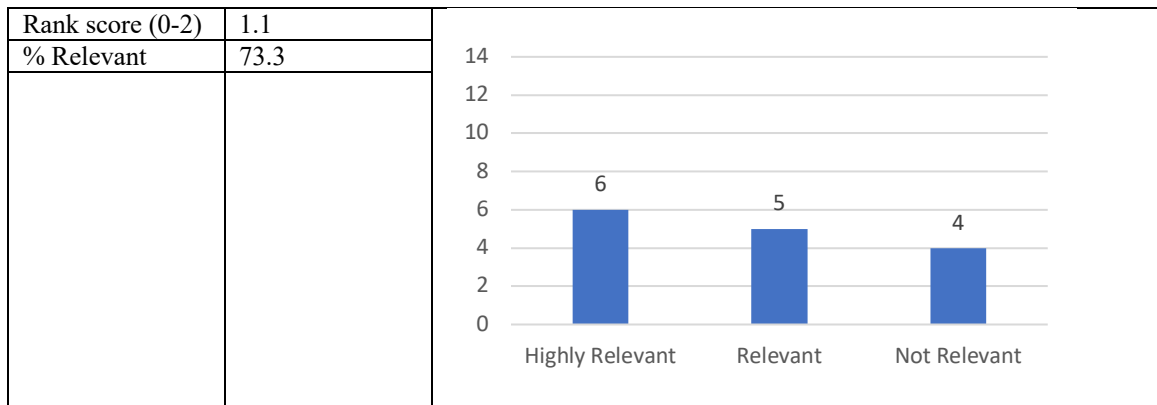

Low

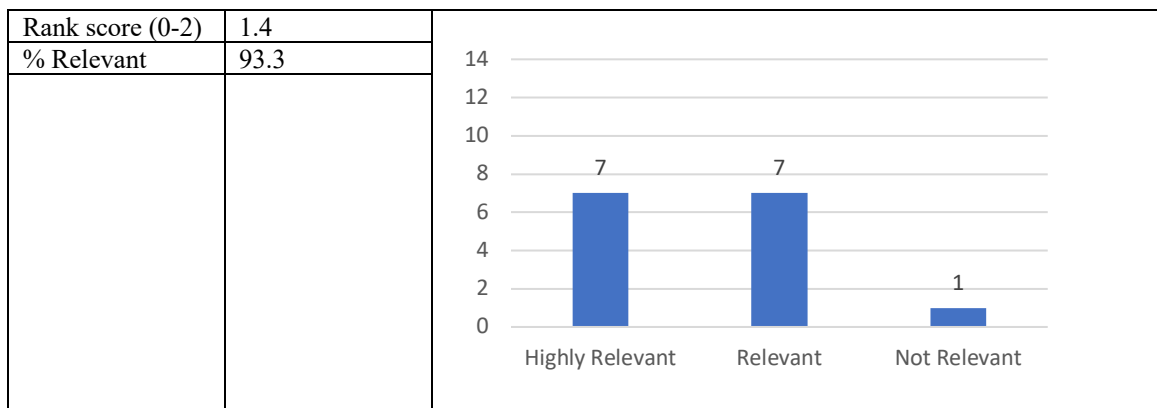

Non-endemic

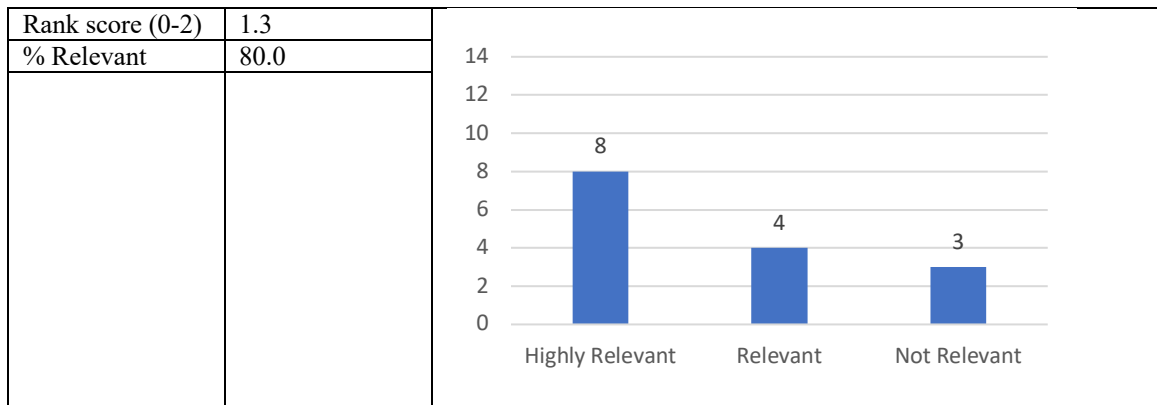

No specific level (i.e. endemic)

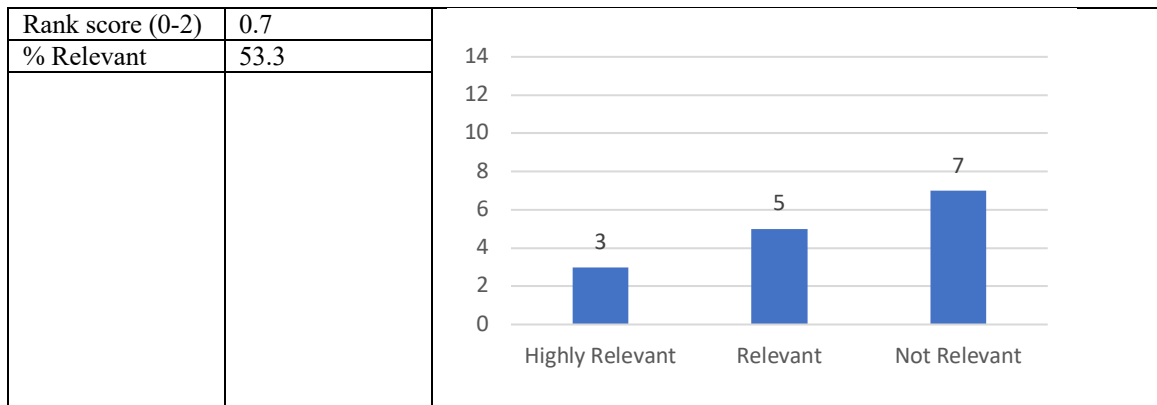

### Scoring Endemicity

8. It is essential to score indicators based on threshold / cut-off values (N=14)

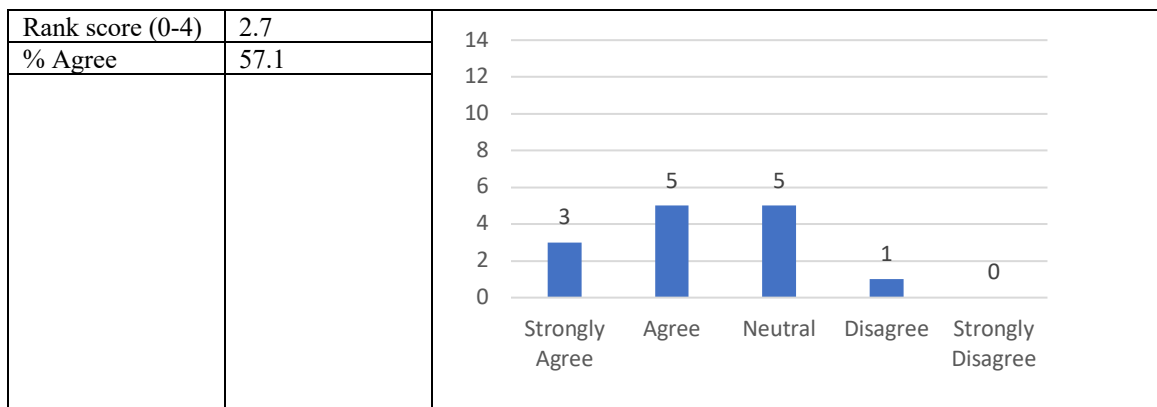

9. There should be one standard for threshold / cut-off values to score indicators at subnational-level worldwide. (N=14)

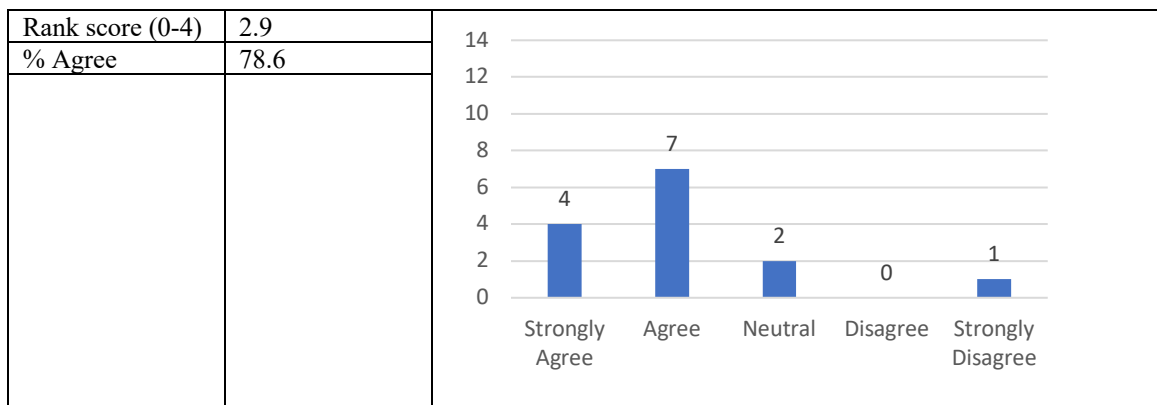

10. Which of the following scoring methods are relevant to determine endemicity of leprosy at subnational level? (N=14)

Score of a single (most relevant) indicator (i.e. one overall classification level)

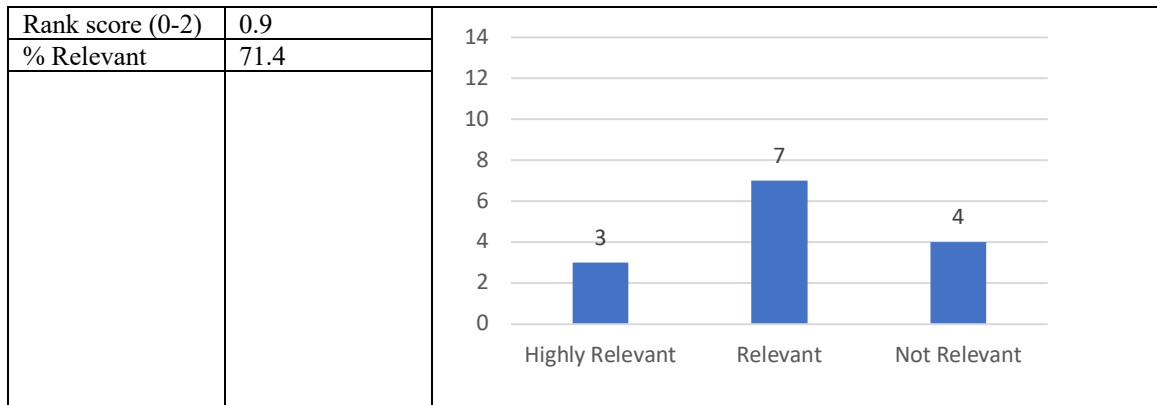

Composite score (i.e. one overall classification level based on multiple relevant indicators)

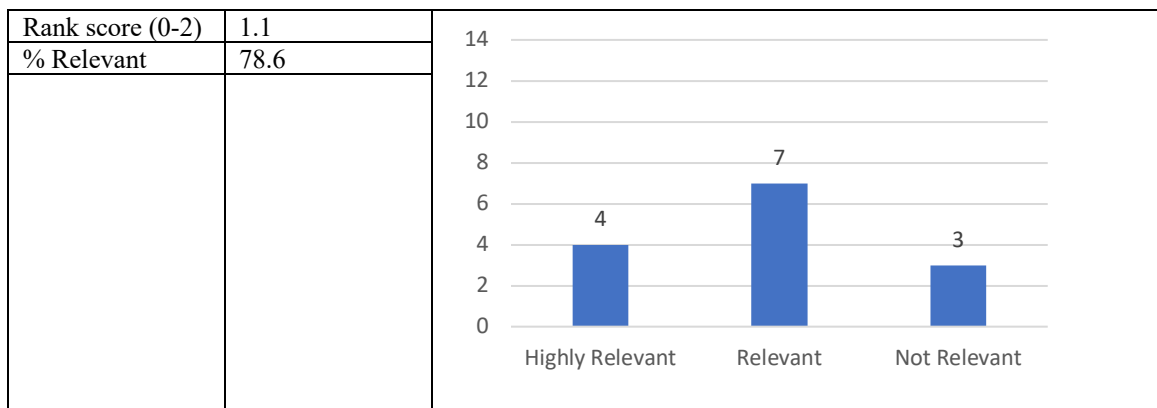

Score of multiple relevant indicators (i.e. multiple classification level: one for each indicator)

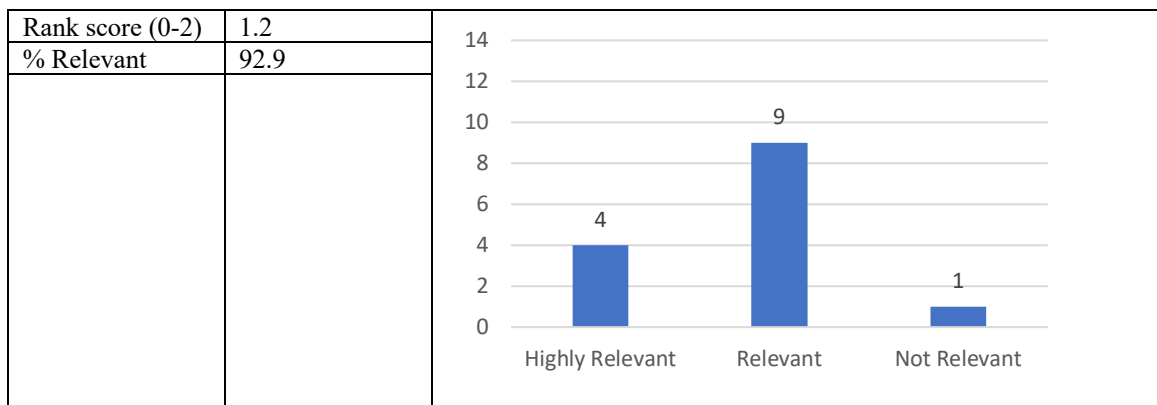

## Indicators of Burden of Leprosy

11. Which of the following indicators are relevant to classify burden of leprosy at sub-national level?  
*Rank them in their order of importance: 1 being the most important and onward numbers being less important; two or more indicators may be ranked the same if they are equally important. Any indicator which you may consider non-relevant could be ranked as NA. (N=16)*

| Indicator                                                                | Ranking |   |   |   |   |   |   |   |   |     | Rank score (0-5) | % Rank top-3 |
|--------------------------------------------------------------------------|---------|---|---|---|---|---|---|---|---|-----|------------------|--------------|
|                                                                          | 1       | 2 | 3 | 4 | 5 | 6 | 7 | 8 | 9 | 10+ |                  |              |
| New case detection (number and/or rate)                                  | 3       | 2 | 1 |   |   |   |   |   |   | 3   | 1.4              | 33.3         |
| Disability adjusted life year (DALY)                                     | 2       |   | 1 | 1 |   | 2 |   |   |   | 4   | 0.8              | 16.7         |
| Prevalence (number and/or rate)                                          | 2       | 1 |   | 1 |   |   | 1 |   |   | 2   | 0.9              | 16.7         |
| Prevalence of people with disabilities due to leprosy                    | 4       |   | 1 | 1 | 1 |   |   |   |   | 1   | 1.4              | 27.8         |
| New cases detected with G2D (number and/or rate)                         | 1       | 1 | 1 | 2 | 2 |   |   |   | 1 | 0   | 1.0              | 16.7         |
| Number of reactions, neuritis & lasting disabilities                     | 1       | 3 | 1 | 2 |   |   | 1 | 1 | 1 | 1   | 1.3              | 27.8         |
| Number of children with disabilities caused by/ after treatment          | 1       |   | 1 | 1 |   | 3 |   | 1 |   | 2   | 0.6              | 11.1         |
| Proportion of G2D cases among total new cases detected                   | 2       |   | 1 |   | 2 | 1 |   |   |   | 1   | 0.8              | 16.7         |
| Quality adjusted life year (QALY)                                        |         | 2 |   |   |   | 1 | 1 |   | 1 | 2   | 0.4              | 11.1         |
| Number requiring assistance (daily living, household duties, work, etc.) |         | 2 | 1 |   | 2 |   |   | 2 | 1 | 1   | 0.7              | 16.7         |
| Number of disabilities caused by/ after treatment                        |         | 1 | 2 |   | 1 |   | 2 |   |   | 2   | 0.6              | 16.7         |
| New cases detected among children (number and/or rate)                   |         | 2 |   |   |   |   |   |   |   | 2   | 0.4              | 11.1         |
| Proportion of child cases among total new cases detected                 |         |   | 1 |   |   |   |   |   |   | 3   | 0.2              | 5.6          |
| Proportion of MB cases among total new cases detected                    |         |   | 1 | 1 |   | 1 |   |   |   | 3   | 0.3              | 5.6          |
| Number requiring surgery                                                 |         |   |   | 1 |   |   | 2 |   | 1 | 5   | 0.1              | 0.0          |
| Proportion with psychological & mental distress                          |         |   |   | 1 | 1 |   | 1 | 1 | 2 | 3   | 0.2              | 0.0          |
| Measures of social & community impact (using stigma scales)              |         |   |   |   | 1 | 1 | 1 | 2 | 1 | 2   | 0.1              | 0.0          |
| Cost of treatment & rehabilitation                                       |         |   |   |   |   | 1 |   | 2 |   | 5   | 0.0              | 0.0          |

## Usage of Indicators to Determine Burden of Leprosy

12. In order to determine leprosy burden, we should use the indicator value of a single year. (N=16)

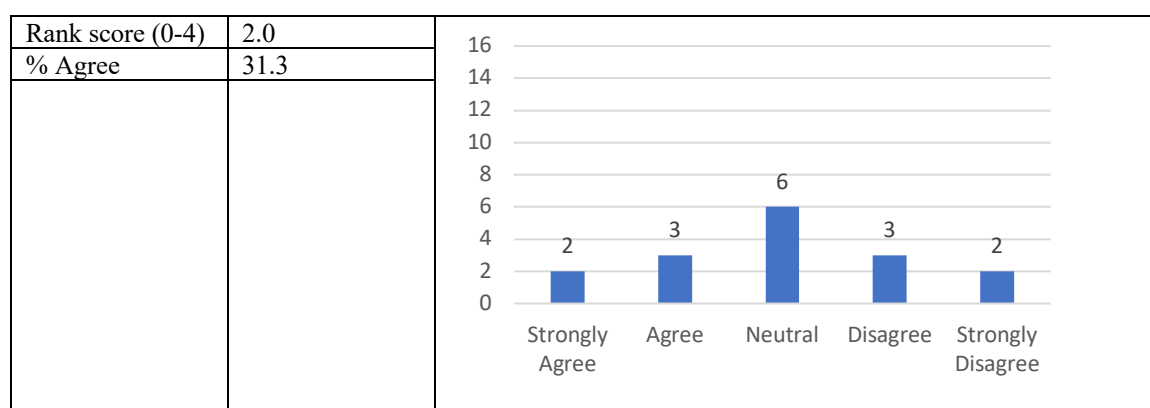

13. In order to determine leprosy burden, we should use the average indicator value of past years (e.g. three or five years). (N=16)

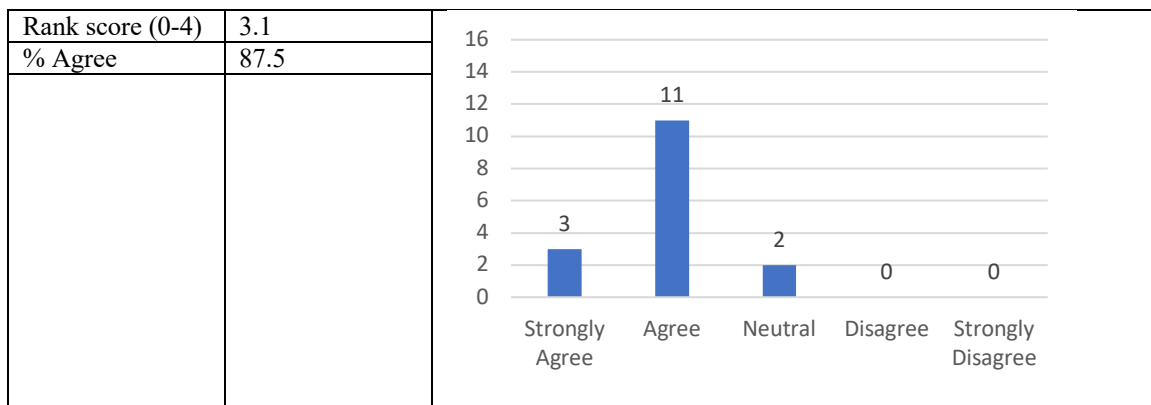

14. In order to determine leprosy burden, we should consider both the indicator value of a single year and the average indicator value of the past three or five years. Burden is determined by the highest of the two. (N=16)

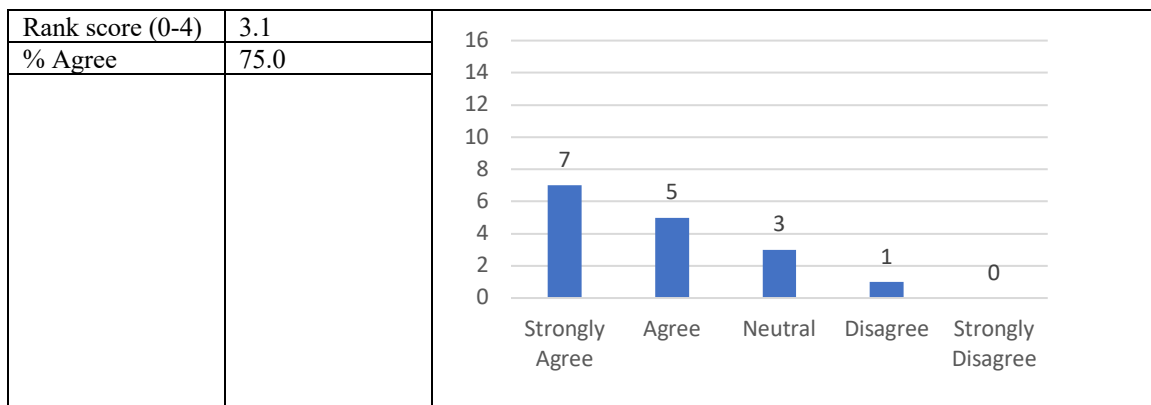

### Classification Levels of Burden of Leprosy

15. Which of the following levels are relevant to categorize burden of leprosy at sub-national level? Please indicate your opinion against each of the mentioned levels. (N=16)

Very High

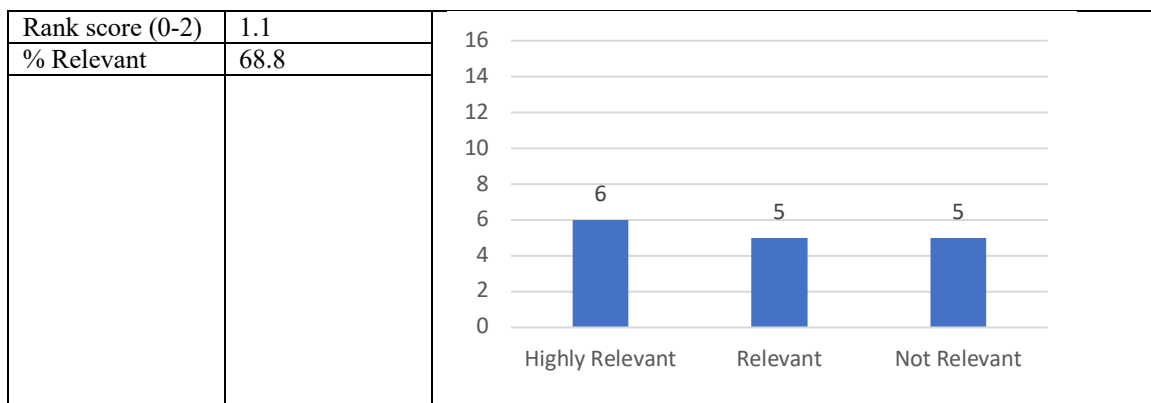



High

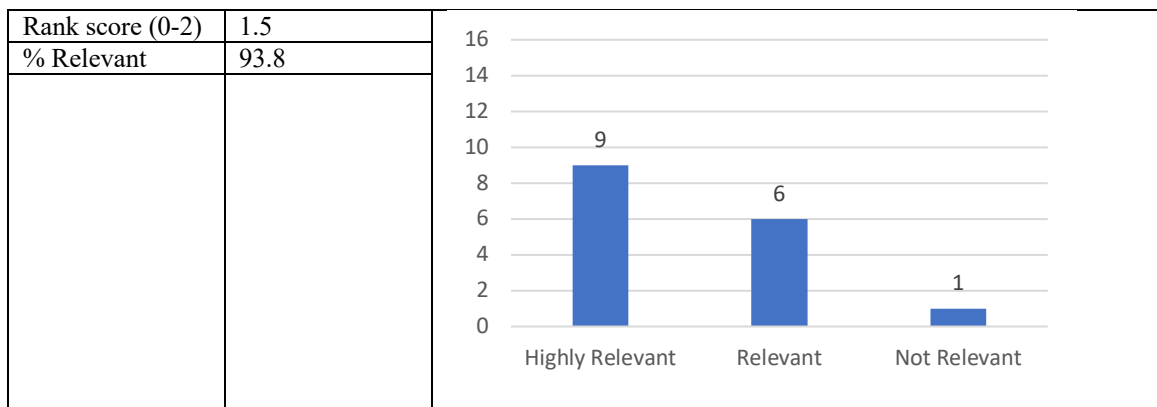

Medium

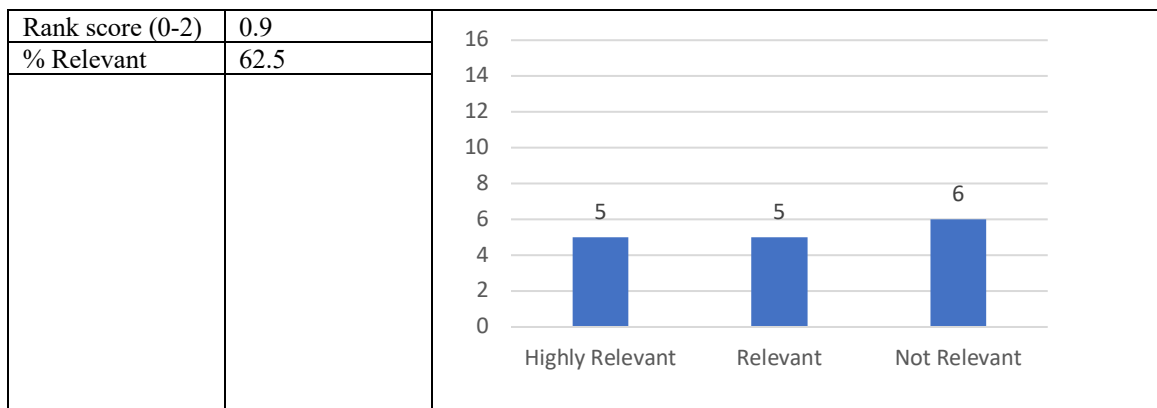

Low

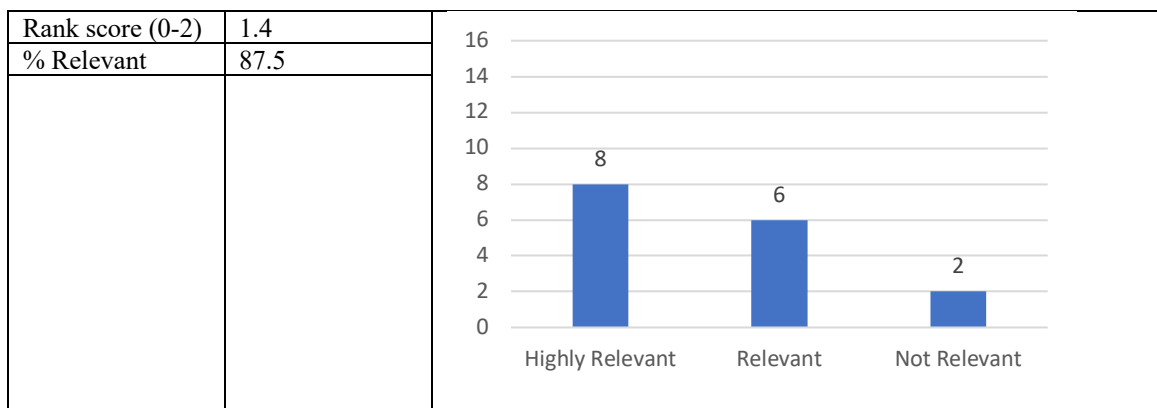

No burden

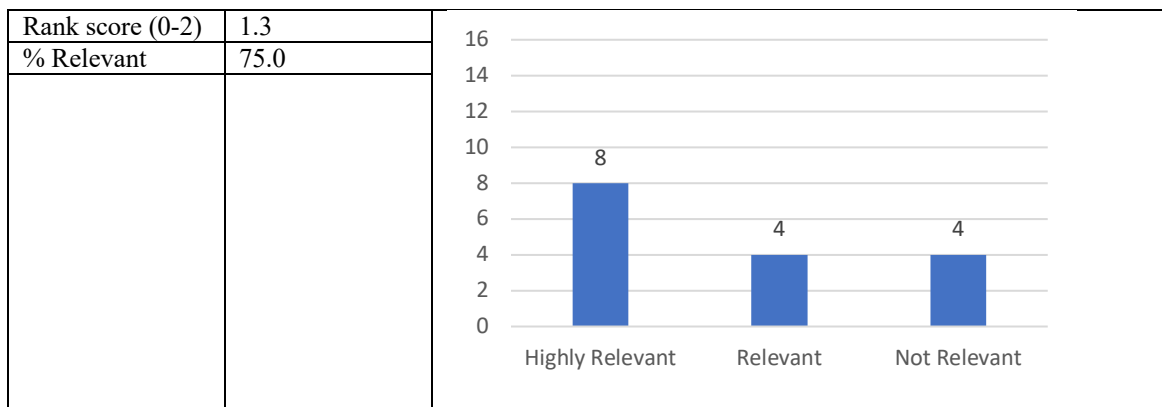

### Scoring Burden of Leprosy

16. It is essential to score indicators based on threshold / cut-off values. (N=15)

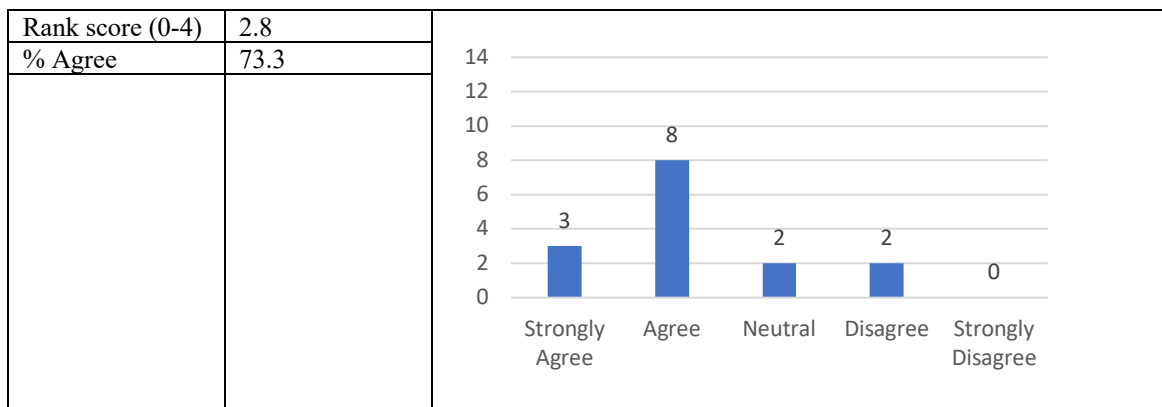

17. There should be one standard for threshold / cut-off values to score indicators at subnational-level worldwide. (N=15)

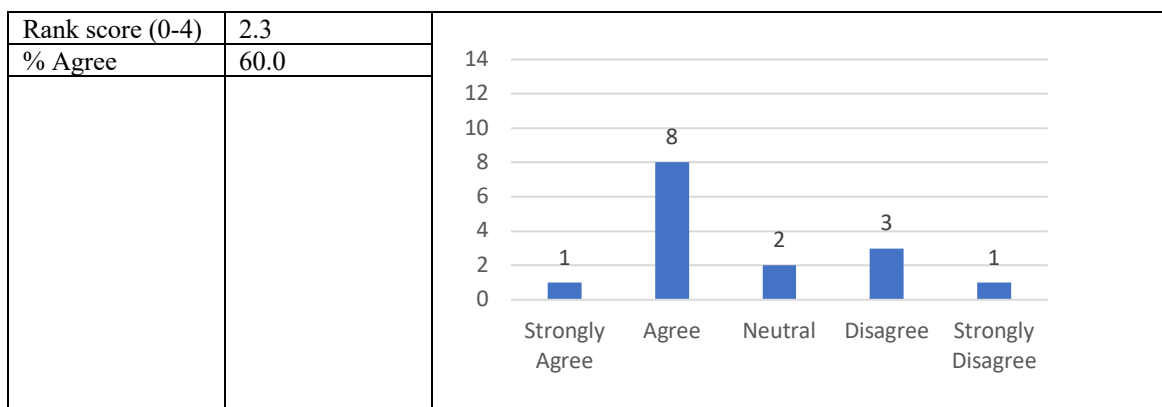

18. Which of the following scoring methods are relevant to determine burden of leprosy at subnational level? (N=15)

Score of a single (most relevant) indicator (i.e. one overall classification level)

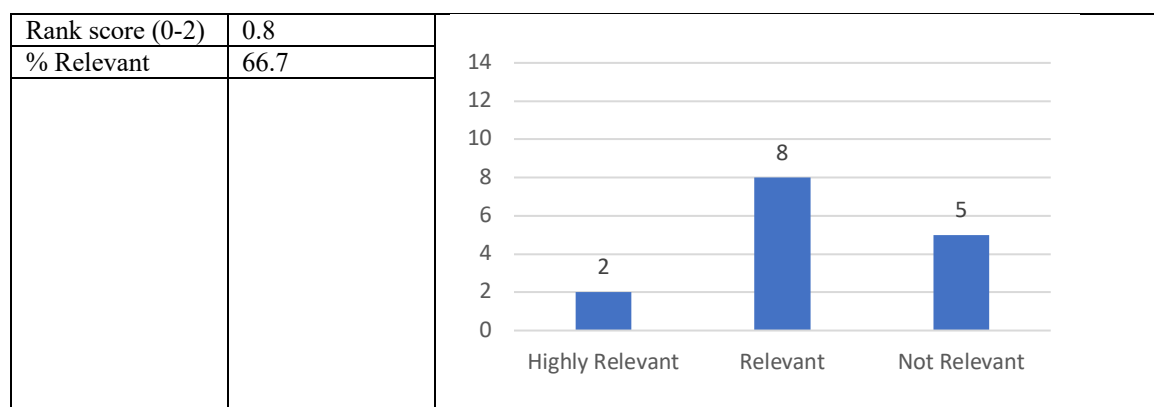

Composite score (i.e. one overall classification level based on multiple relevant indicators)

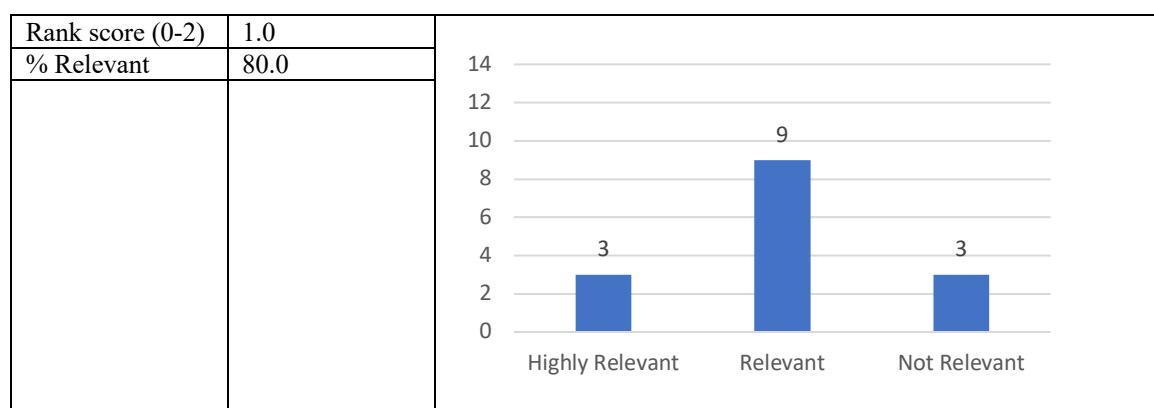

Score of multiple relevant indicators (i.e. multiple classification level: one for each indicator)

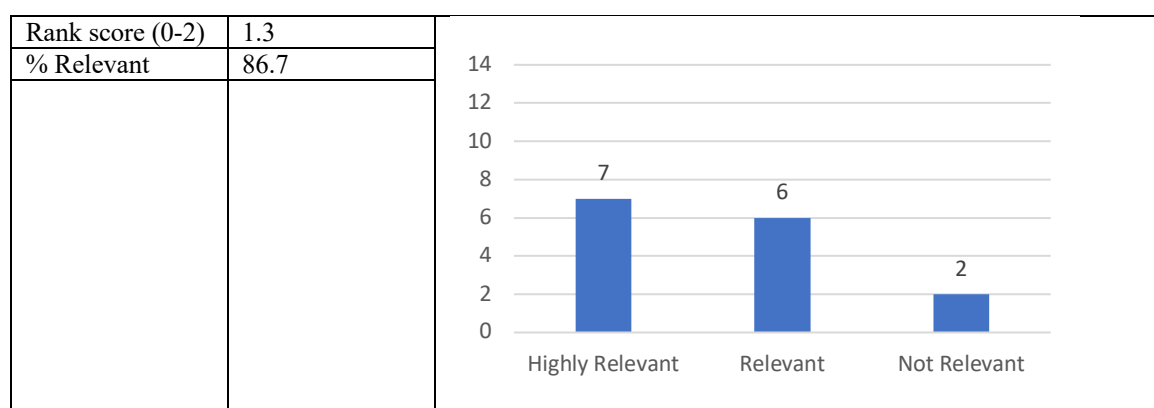

Supplement: pntd.0009769.s003.pdf [file pntd.0009769.s003.pdf]
