# Supplementary material for: Measuring endemicity and burden of leprosy across countries and regions: A systematic review and Delphi survey
Source: PubMed Central journal article supplement (PMC8483296; doi:10.1371/journal.pntd.0009769), 2021-09-20
Supplement: pntd.0009769.s001.pdf [file pntd.0009769.s001.pdf]

## S1 Table Search strategy

| <b>Database</b>         | <b>Search terms</b>                                                                                                                                                                                                                                                                                        |
|-------------------------|------------------------------------------------------------------------------------------------------------------------------------------------------------------------------------------------------------------------------------------------------------------------------------------------------------|
| <i>Embase</i>           | ('leprosy'/exp OR 'leprosy epidemiology'/exp OR 'leprosy control'/de OR 'Mycobacterium leprae'/de OR 'lepromin'/de OR (hansen* OR lepra* OR lepro*):ab,ti) NOT ('endemic disease'/exp OR (endemi* OR hyperendemi*):ab,ti) AND ('disease burden'/exp OR ('burden of* OR disease*'):ab,ti) AND [english]/lim |
| <i>Medline Ovid</i>     | (exp Leprosy/ OR Mycobacterium leprae/ OR Lepromin/ OR (hansen* OR lepra* OR lepro*).ab,ti.) AND (Endemic Diseases/ OR (endemi* OR hyperendemi*).ab,ti.) AND (disease burden/ OR (burden of* OR disease*).ab,ti.) AND english.la.                                                                          |
| <i>Web of science</i>   | TS=((((hansen* OR lepra* OR lepro*)) AND ((endemi* OR hyperendemi*)) AND ((burden* OR disease*)))                                                                                                                                                                                                          |
| <i>Cochrane CENTRAL</i> | ((hansen* OR lepra* OR lepro*):ab,ti) AND ((endemi* OR hyperendemi*):ab,ti) AND ((burden* OR disease*):ab,ti)                                                                                                                                                                                              |
| <i>Lilacs</i>           | (hansen* OR lepra* OR lepro*) AND (endemi* OR hyperendemi*)                                                                                                                                                                                                                                                |
| <i>Scielo</i>           | (hansen* OR lepra* OR lepro*) AND (endemi* OR hyperendemi*)                                                                                                                                                                                                                                                |
| <i>Google scholar</i>   | hansen lepra leprosyendemicity hyperendemicity endemic hyperendemic                                                                                                                                                                                                                                        |
